# Supplementary material for: The Pyrroloquinoline-Quinone-Dependent Pyranose Dehydrogenase from Coprinopsis cinerea Drives Lytic Polysaccharide Monooxygenase Action
Source: PubMed Central journal article supplement (PMC5960967; doi:10.1128/aem.00156-18), 2018-05-17
Supplement: AEM.00156-18_zam011188534s1.pdf [file AEM.00156-18_zam011188534s1.pdf]

**The pyrroloquinoline-quinone dependent pyranose dehydrogenase from *Coprinopsis cinerea* (CcPDH) drives lytic polysaccharide monooxygenase (LPMO) action**

Anikó Várnai<sup>a,\*</sup>, Kiwamu Umezawa<sup>b,†,\*</sup>, Makoto Yoshida<sup>b,†,#</sup>, Vincent G. H. Eijsink<sup>a,†,#</sup>

<sup>a</sup>Faculty of Chemistry, Biotechnology and Food Science, Norwegian University of Life Sciences (NMBU), 1432 Ås, Norway

<sup>b</sup>Department of Environmental and Natural Resource Science, Tokyo University of Agriculture and Technology, Tokyo 183-8509, Japan

**SUPPLEMENTAL INFORMATION**

**CONTENTS**

- **Figure S1.** Identification of products generated by CcPDH from D-glucosone and L-fucose with HPAEC-PAD.
- **Figure S2.** Products generated by NcLPMO9F or NcLPMO9C from PASC using CcPDH as electron donor.
- **Figure S3.** HPAEC-PAD chromatograms showing lack of NcLPMO9F or NcLPMO9C activity by boiled CcPDH products.
- **Figure S4.** HPAEC-PAD chromatograms showing the lack of activity of CcPDH on D-glucose.
- **Figure S5.** The effect of adding extra PQQ and Ca<sup>2+</sup> on the activity of holo-CcPDH.

FIGURE S1

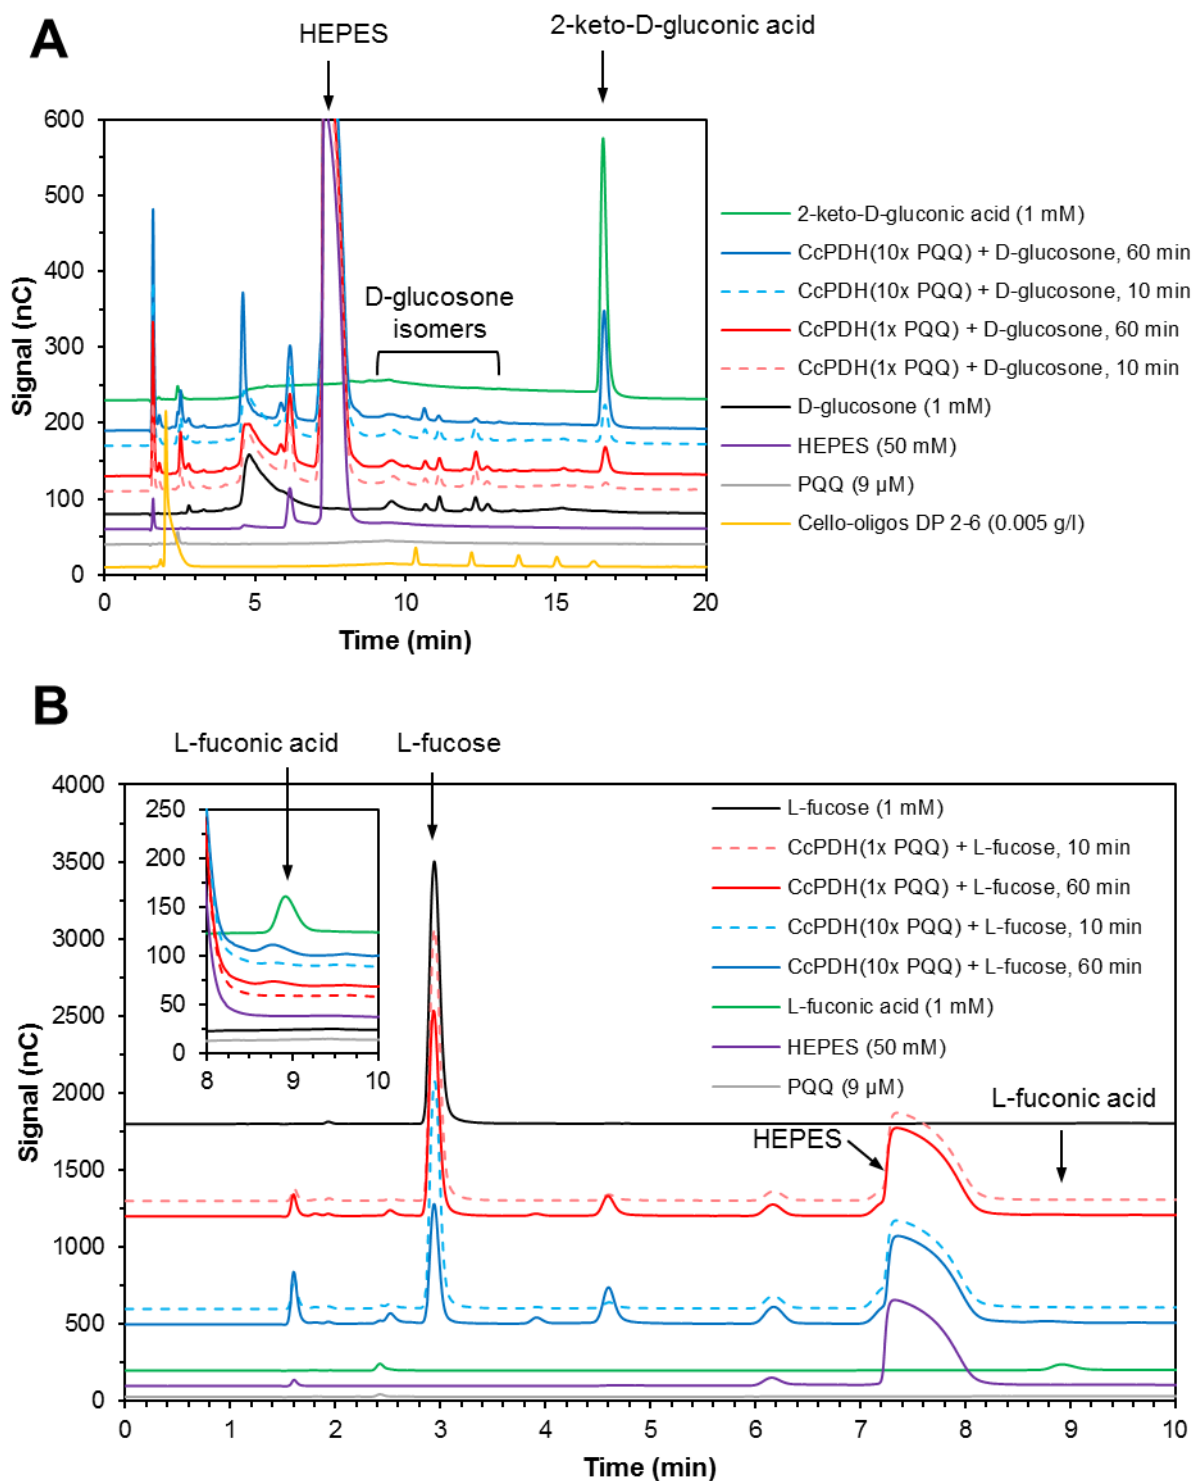

**Figure S1.** Identification of products generated by CcPDH from (A) D-glucosone and (B) L-fucose with HPAEC-PAD. For reaction conditions, see Materials and methods. The retention times of the characteristic reaction products are 16.6 min (2-keto-D-gluconic acid generated from D-glucosone; Panel A) and 8.9 min (L-fuconic acid, generated from L-fucose; panel B). “1x PQQ” means PQQ-saturated CcPDH (1  $\mu$ M), whereas “10x PQQ” means that an additional 9  $\mu$ M of PQQ was added to the reaction mixture. The insert in panel B shows the L-fuconic acid peak; note that the response factor for this compound is so low that it is hardly detectable in most experiments.

FIGURE S2

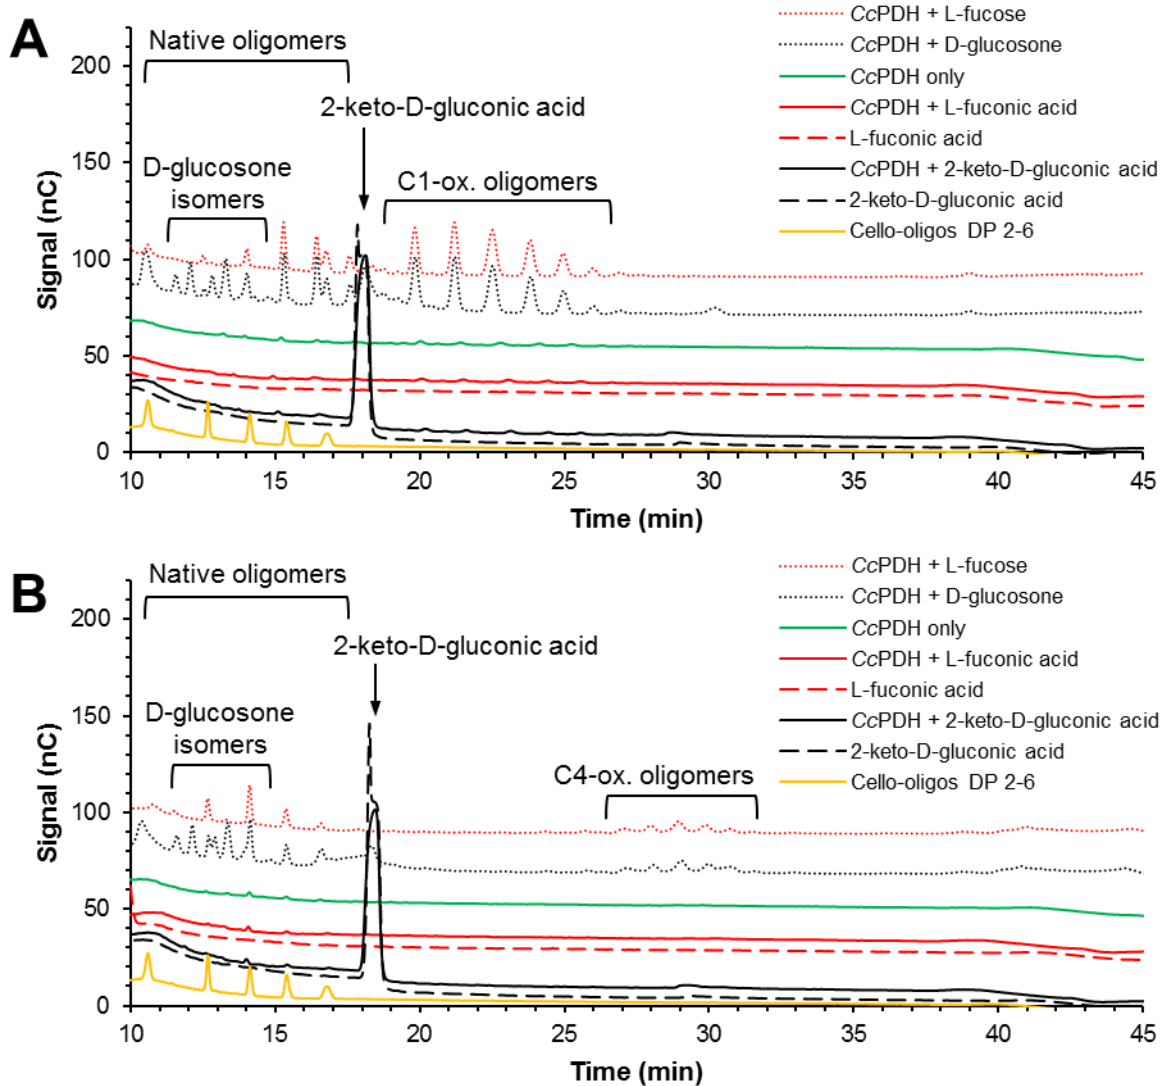

**Figure S2.** Products generated by (A) *NcLPMO9F* or (B) *NcLPMO9C* from PASC using *CcPDH* as electron donor. The figure shows that the LPMOs released oxidized oligosaccharides only when *CcPDH* and its substrate, D-glucosone or L-fucose, were supplied together. Neither 2-keto-D-gluconic acid or L-fuconic acid, the corresponding products of *CcPDH*, were able to activate the LPMOs, independently of the presence of *CcPDH*. Reaction mixtures contained 0.2% (w/v) PASC in 20 mM HEPES buffer at pH 7.0 and were incubated at 30 °C for 10 min. The reactions contained 1  $\mu$ M *CcPDH* with 1 mM D-glucosone (black dotted line) or L-fucose (red dotted line) as electron donating system. Control experiments included 1  $\mu$ M *CcPDH* with 1 mM 2-keto-D-gluconic acid (black solid line) or L-fuconic acid (red solid line), 1  $\mu$ M *CcPDH* only (green line), 1 mM 2-keto-D-gluconic acid only (black dashed line) and 1 mM L-fuconic acid only (red dashed line).

FIGURE S3

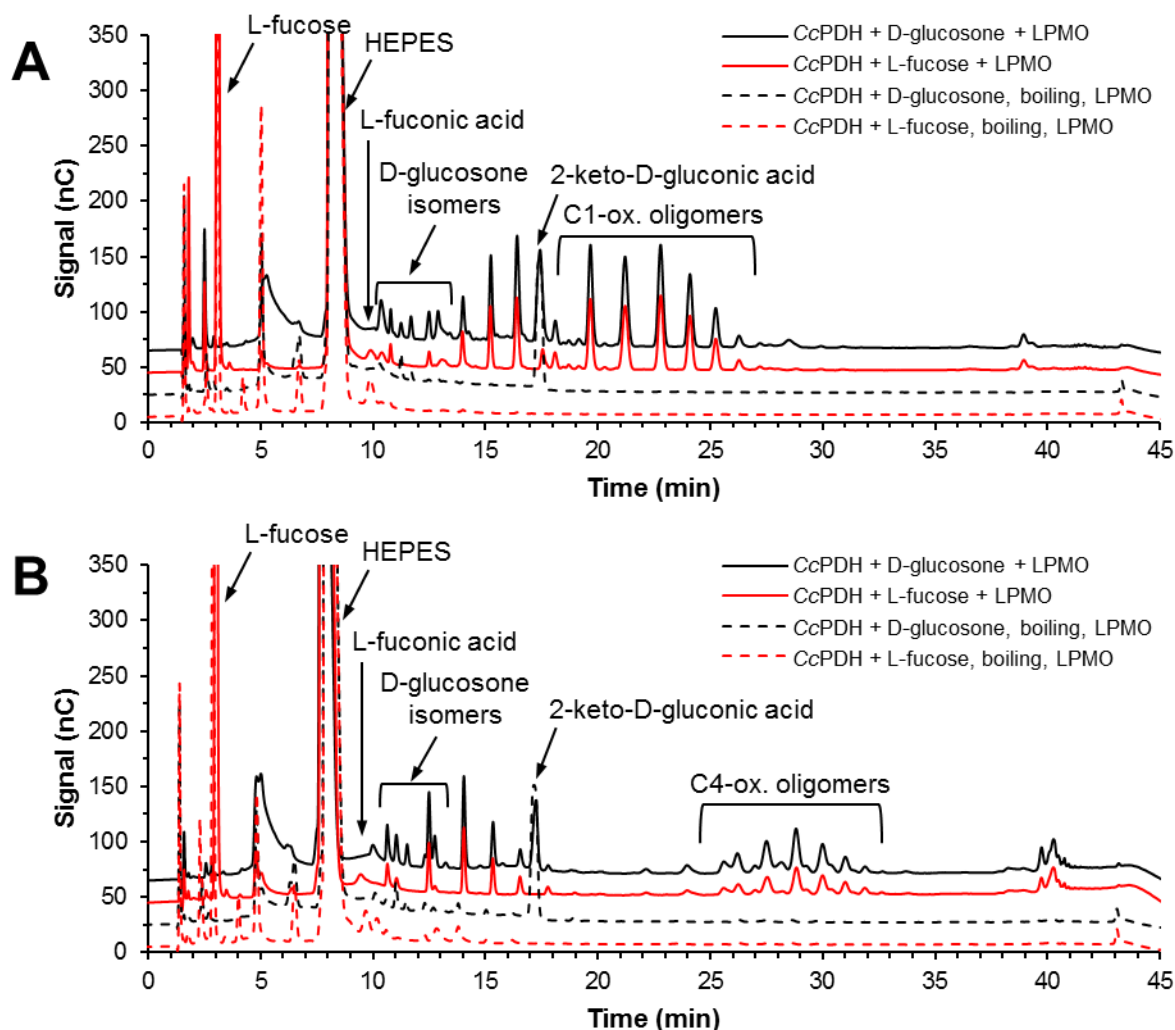

**Figure S3.** HPAEC-PAD chromatograms showing lack of (A) *NcLPMO9F* or (B) *NcLPMO9C* activity by boiled *CcPDH* products. Products generated by (A) *NcLPMO9F* or (B) *NcLPMO9C* from PASC, using *CcPDH* as electron donor or boiled *CcPDH* products. The LPMOs were co-incubated with *CcPDH* and D-glucosone (black solid line) or *CcPDH* and L-fucose (red solid line), or with a boiled reaction mixture of *CcPDH* pre-incubated with D-glucosone (black dashed line) or L-fucose (red dashed line). Reaction mixtures (yielding the solid lines) contained 0.2% (w/v) PASC, 1  $\mu\text{M}$  LPMO and 1  $\mu\text{M}$  *CcPDH* in 20 mM HEPES buffer at pH 7.0 and were supplemented with 10 mM  $\text{CaCl}_2$ , 1 mM PQQ and 1 mM D-glucosone (black) or L-fucose (red) and were incubated for 10 min at 30  $^\circ\text{C}$ . Reactions done to assess the effect of possibly unknown additional reaction products of *CcPDH* were incubated at 30  $^\circ\text{C}$  for 10 min and boiled for 5 min prior to addition of 1  $\mu\text{M}$  LPMO, followed by another incubation at 30  $^\circ\text{C}$  for 10 min.

FIGURE S4

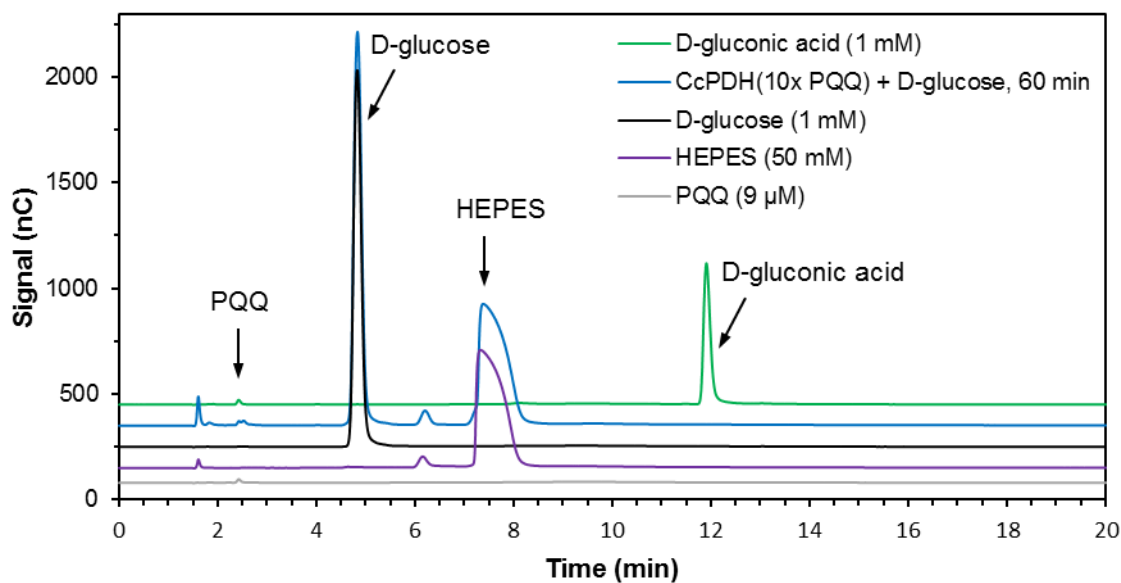

**Figure S4.** HPAEC-PAD chromatograms showing the lack of activity of *CcPDH* on D-glucose. Comparison of the four standards with the reaction mixture obtained after incubating *CcPDH* with 1 mM D-glucose and an additional 9  $\mu\text{M}$  of PQQ in 50 mM HEPES pH 7.0, at 30  $^{\circ}\text{C}$ , for 60 minutes, shows that glucose had not been converted by *CcPDH*.

FIGURE S5

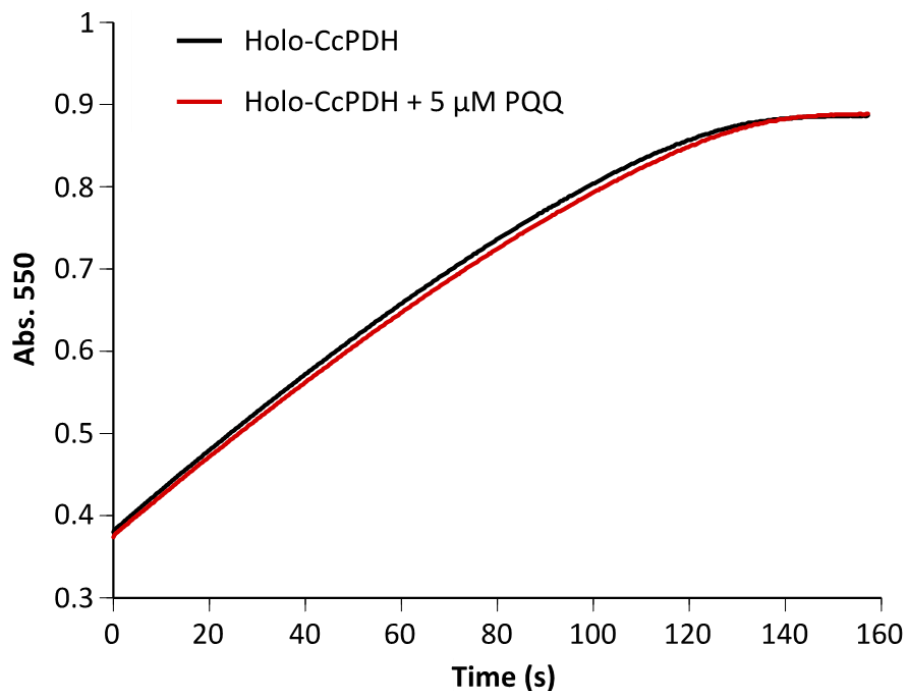

**Figure S5.** The effect of adding extra PQQ and  $\text{Ca}^{2+}$  on the activity of holo-*Cc*PDH. The curves show reduction of cytochrome *c* over time in reactions containing 200 nM presumably saturated *Cc*PDH and 50  $\mu\text{M}$  cytochrome *c* in 50 mM PIPES-NaOH (pH 7.0), 1 mM L-fucose. The curve labeled “+ 5  $\mu\text{M}$  PQQ” shows results for a similar reaction mixture which was supplemented with additional PQQ and  $\text{CaCl}_2$  (50  $\mu\text{M}$ ). The fact that the two curves are identical indicates that the presumably saturated *Cc*PDH indeed was saturated.
